# Supplementary material for: In-Depth Analysis of an Obligate Anaerobe Paraclostridium bifermentans Isolated from Uterus of Bubalus bubalis
Source: MDPI journal article supplement (doi:10.3390/ani12141765), 2022-07-09
Supplement: s1 [file s1]

**Title In-depth analysis of an obligate anaerobe *Paraclostridium bifermentans* isolated from uterus of *Bubalus bubalis***

Purva Gohil<sup>1</sup>, Kajal Patel<sup>1</sup>, Srushti Patel<sup>2</sup>, Ramesh Pandit<sup>1</sup>, Vishal Suthar<sup>3\*</sup>, Srinivas Duggirala<sup>2</sup>, Madhavi Joshi<sup>1</sup>, D B Patil<sup>3</sup> and C G Joshi<sup>1</sup>

<sup>1</sup> Gujarat Biotechnology Research Centre, Gandhinagar, Gujarat- 302010

<sup>2</sup> Department of Microbiology, Gujarat Vidyapith

<sup>3</sup> Directorate of Research, Kamdhenu University, Gandhinagar, Gujarat, India-382010

\*Corresponding author:

Vishal Suthar. Email: [vsuthar28@gmail.com](mailto:vsuthar28@gmail.com)

M: +919824491049

Directorate of Research, Kamdhenu University

Gandhinagar, Gujarat, India-382010

**Table S1.** Predicted genes from the whole genome with different gene-finding tools.

| Program               | No. of genes predicted |
|-----------------------|------------------------|
| Prodigal              | 3495                   |
| Glimmer-3             | 3521                   |
| GenemarkS+2           | 3,511                  |
| MetaGeneAnn<br>otator | 3456                   |

**Table S2.** Genome annotation results with different platforms.

| Feature  | PROKKA | RAST | DFAST | PGAP<br>(NCBI) |
|----------|--------|------|-------|----------------|
| Genes    | 3449   | 3521 | 3456  | 3511           |
| rRNAs    | 5      | 6    | 1     | 3              |
| tRNAs    | 55     | 54   | 36    | 55             |
| CRISPERS | 0      | 0    | 0     | 0              |

**Table S3.** Digital DDH values for pairwise comparisons of user genomes vs. type strain genomes.

| Query strain                                          | Subject strain                                                                             | dDDH (in %) | G+C content<br>difference (in %) |
|-------------------------------------------------------|--------------------------------------------------------------------------------------------|-------------|----------------------------------|
| <i>Paraclostridium</i><br><i>bifermentans</i><br>GBRC | <i>Paraclostridium dentum</i><br>SKVG24 T                                                  | 82.7        | 0.53                             |
| <i>Paraclostridium</i><br><i>bifermentans</i><br>GBRC | <i>Paraclostridium</i><br><i>bifermentans</i> subsp.<br><i>muricolitidis</i> CCUG<br>72489 | 80.5        | 0.78                             |
| <i>Paraclostridium</i><br><i>bifermentans</i><br>GBRC | <i>Paraclostridium</i><br><i>bifermentans</i> ATCC 638                                     | 72.5        | 0.43                             |

|                                                       |                                                       |      |      |
|-------------------------------------------------------|-------------------------------------------------------|------|------|
| <i>Paraclostridium</i><br><i>bifermentans</i><br>GBRC | <i>Paraclostridium</i><br><i>benzoelyticum</i> JC272  | 66.6 | 0.57 |
| <i>Paraclostridium</i><br><i>bifermentans</i><br>GBRC | <i>Paeniclostridium</i><br><i>ghonii</i><br>DSM 15049 | 39.3 | 1.06 |
| <i>Paraclostridium</i><br><i>bifermentans</i><br>GBRC | <i>Paeniclostridium</i><br><i>sordellii</i> ATCC 9714 | 31.5 | 1.43 |
| <i>Paraclostridium</i><br><i>bifermentans</i><br>GBRC | <i>Romboutsia</i><br><i>ilealis</i> CRIB              | 27.4 | 0.96 |
| <i>Paraclostridium</i><br><i>bifermentans</i><br>GBRC | <i>Romboutsia</i><br><i>hominis</i><br>FRIFI          | 26.4 | 0.51 |
| <i>Paraclostridium</i><br><i>bifermentans</i><br>GBRC | <i>Clostridium</i><br><i>dakarensis</i><br>FF1        | 26.2 | 0.89 |
| <i>Paraclostridium</i><br><i>bifermentans</i><br>GBRC | <i>Romboutsia</i><br><i>lituseburensis</i> DSM 797    | 26   | 1.18 |

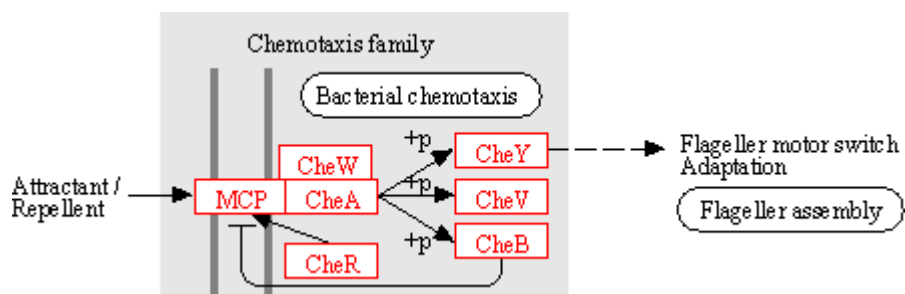

**Figure S1.** Flagellar assembly of strain GBRC in a hydrophobic environment where cheW is purine-binding chemotaxis protein, MCP; aerotaxis receptor, CheA; two-component system, CheR; chemotaxis protein methyl transferase, CheB; Protein-glutamate, CheV; two-component system.

# VANCOMYCIN RESISTANCE

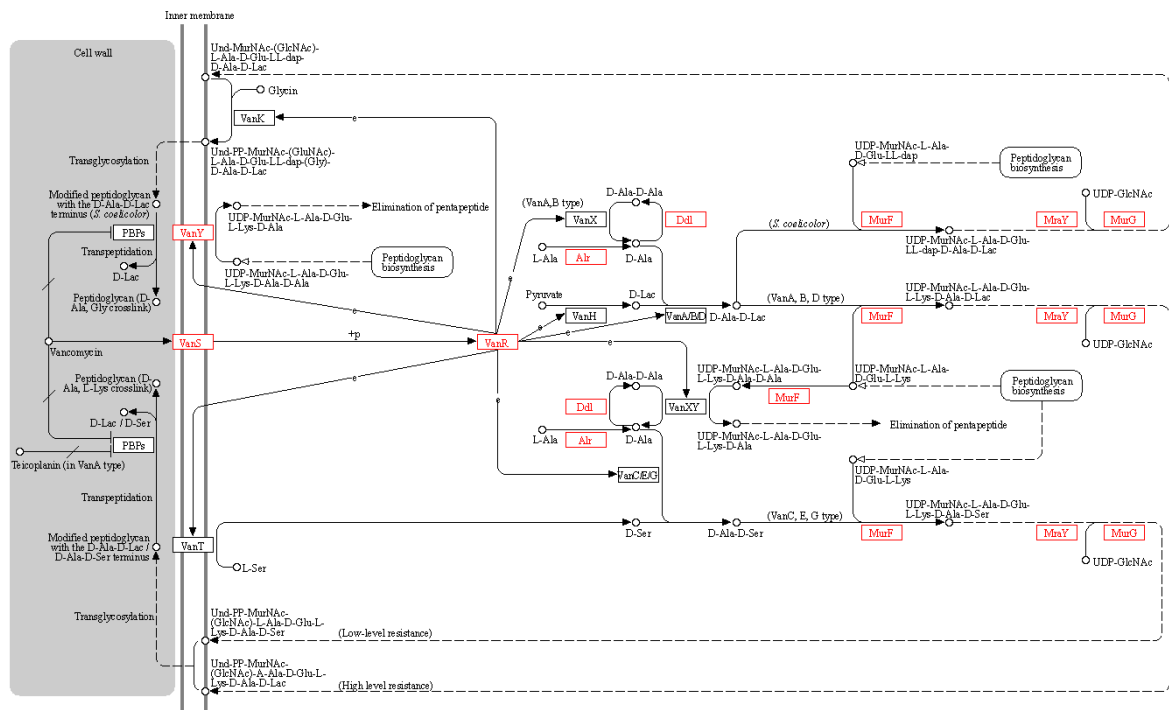

## Vancomycin resistance operon types

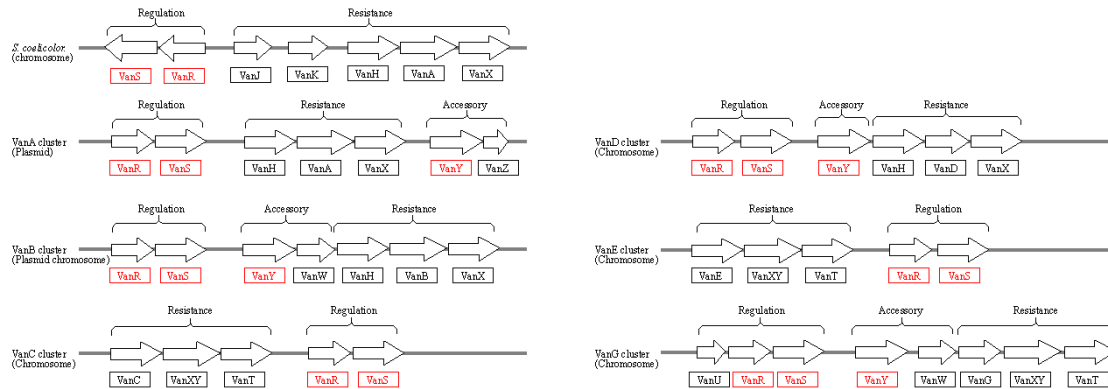

**Figure S2.** KEGG pathway for vancomycin resistance mechanism
